# Supplementary material for: Systemic prime exacerbates the ocular immune response to heat-killed Mycobacterium tuberculosis
Source: PubMed Central journal article supplement (PMC10240933; doi:10.1016/j.exer.2022.109198), 2022-07-31
Supplement: NIHMS1899506-supplement-Supplemental_Table_1.pdf [file NIHMS1899506-supplement-Supplemental_Table_1.pdf]

Supplemental Table 1. Day 1 Vitreous cytokine concentrations

| Cytokine | Wild type C57BL/6 |      |         |         |      |              |       |         |         |      | RAG2 deficient |         |
|----------|-------------------|------|---------|---------|------|--------------|-------|---------|---------|------|----------------|---------|
|          | Naïve             |      | UMU D1  |         | p    | Primed naïve |       | PMU D1  |         |      | PMU D1         |         |
|          | pg/ml             | STD  | pg/ml   | STD     |      | pg/ml        | STD   | pg/ml   | STD     | p    | pg/ml          | STD     |
| G-CSF    | 96.1              | 87.7 | 374.3   | 446.3   |      | 255.0        | 131.7 | 2,720.0 | 1,338.0 | *    | 1,089.0        | 1,104.0 |
| IL-6     | 3.0               | 1.6  | 455.6   | 543.4   |      | 10.5         | 18.0  | 3,113.0 | 1,882.0 |      | 1,017.0        | 925.3   |
| IL-17    | <2.01             | 0.0  | 4.0     | 0.7     | **   | <2.01        | 0.0   | 24.6    | 10.3    | *    | 3.1            | 0.3     |
| Eotaxin  | 26.7              | 17.9 | 37.5    | 4.6     |      | 31.0         | 21.7  | 156.7   | 50.3    | **   | 41.0           | 12.9    |
| LIF      | <2.79             | 0.0  | 129.1   | 31.7    | **   | <2.79        | 0.0   | 516.0   | 242.6   | *    | 352.9          | 373.9   |
| IP-10    | 22.0              | 11.4 | 162.1   | 81.9    | *    | 22.0         | 4.4   | 552.4   | 204.0   | *    | 143.1          | 44.2    |
| KC       | 3.9               | 2.8  | 285.7   | 321.4   |      | 6.4          | 7.5   | 854.3   | 615.4   |      | 417.0          | 381.8   |
| MIP-1b   | <49.61            | 0.0  | 113.6   | 12.9    | ***  | 53.2         | 6.6   | 297.4   | 83.1    | **   | 143.5          | 59.7    |
| M-CSF    | 8.0               | 7.5  | 126.8   | 36.4    | ***  | 7.9          | 6.7   | 299.7   | 176.4   |      | 97.0           | 45.3    |
| MIP-1a   | 66.6              | 23.0 | 124.1   | 29.1    | *    | 83.4         | 51.9  | 279.6   | 65.3    | **   | 148.2          | 87.6    |
| MIP-2    | 37.3              | 12.8 | 2,350.0 | 1,168.0 | *    | 39.3         | 12.5  | 4,979.0 | 1,837.0 | **   | 3,528.0        | 2,883.0 |
| MIG      | 36.8              | 33.8 | 51.0    | 10.0    |      | 27.6         | 19.0  | 105.2   | 8.5     | ***  | 37.5           | 3.8     |
| IL-5     | <2.16             | 0.0  | 5.8     | 1.5     | *    | <2.16        | 0.0   | 11.6    | 0.9     | **** | 9.6            | 1.5     |
| RANTES   | <1.8              | 0.4  | 4.2     | 0.3     | **** | <1.8         | 0.0   | 7.3     | 2.1     | **   | 4.5            | 0.5     |
| IL-1b    | 3.9               | 4.1  | 169.0   | 67.3    | *    | 2.6          | 1.3   | 282.3   | 103.0   | **   | 194.8          | 218.2   |
| TNF-a    | <2.0              | 3.7  | 22.9    | 6.1     | **   | <2.0         | 0.0   | 36.6    | 8.6     | **   | 12.2           | 3.1     |
| 1l-12p40 | 6.2               | 4.3  | 22.5    | 2.7     | ***  | 6.7          | 5.8   | 34.7    | 4.6     | **** | 21.4           | 1.6     |
| IL-1a    | 150.8             | 58.9 | 462.8   | 150.4   | *    | 148.7        | 23.9  | 674.1   | 311.3   | *    | 369.0          | 357.1   |
| IL-4     | <2.3              | 0.0  | 3.3     | 0.7     |      | <2.3         | 0.0   | 4.6     | 1.7     | **** | 2.3            | 0.5     |
| IFN-g    | 20.5              | 11.0 | 33.4    | 3.9     |      | 16.8         | 3.2   | 45.3    | 7.2     | ***  | 36.7           | 10.2    |
| IL-3     | <2.1              | 0.0  | 4.3     | 1.3     |      | <2.1         | 0.0   | 5.7     | 0.4     | **** | 2.4            | 0.2     |
| MCP-1    | 6.7               | 6.2  | 193.4   | 127.5   |      | 5.0          | 5.5   | 257.5   | 122.6   | *    | 250.6          | 184.0   |
| IL12-p70 | 2.6               | 1.8  | 36.9    | 1.5     | **** | 2.0          | 0.4   | 45.9    | 4.3     | **** | 38.3           | 3.4     |
| GM-CSF   | 5.4               | 3.0  | 45.7    | 1.6     | **** | 6.2          | 5.0   | 56.4    | 5.9     | **** | 48.4           | 5.4     |
| Il-15    | 58.8              | 16.1 | 158.7   | 15.3    | **** | 60.3         | 16.2  | 185.4   | 8.4     | **** | 144.6          | 18.4    |
| LIX      | 3.9               | 4.8  | 220.2   | 49.6    | **   | 5.0          | 7.3   | 254.7   | 63.6    | **   | 250.5          | 45.9    |
| IL-2     | 24.0              | 11.0 | 19.7    | 6.9     |      | 15.0         | 4.9   | 21.4    | 2.1     |      | 7.6            | 0.3     |
| IL-7     | <1.7              | 0.0  | 12.4    | 3.3     | **   | 2.3          | 1.2   | 12.9    | 0.9     | **** | 18.1           | 2.3     |
| il-10    | 18.2              | 12.1 | 71.1    | 27.4    | *    | 17.3         | 4.9   | 64.7    | 8.8     | ***  | 51.1           | 15.3    |
| VEGF     | 37.9              | 2.5  | 31.4    | 16.7    |      | 19.9         | 10.5  | 14.7    | 4.8     |      | 4.4            | 0.7     |
| il-9     | 51.6              | 55.3 | 1,740.0 | 759.5   | *    | 116.3        | 110.3 | 701.7   | 152.1   | ***  | 429.3          | 28.2    |
| Il-13    | 7.1               | 7.7  | 284.9   | 112.0   | *    | <3.6         | 0.0   | 99.7    | 27.7    | **   | 106.1          | 21.8    |
