# Supplementary material for: Systemic prime exacerbates the ocular immune response to heat-killed Mycobacterium tuberculosis
Source: PubMed Central journal article supplement (PMC10240933; doi:10.1016/j.exer.2022.109198), 2022-07-31
Supplement: NIHMS1899506-supplement-Supplemental_Table_2.pdf [file NIHMS1899506-supplement-Supplemental_Table_2.pdf]

| <b>Supplemental Table 2. Day 7 Vitreous cytokine concentrations</b> |                          |            |               |            |                |
|---------------------------------------------------------------------|--------------------------|------------|---------------|------------|----------------|
|                                                                     | <b>Wild type C57BL/6</b> |            |               |            |                |
|                                                                     | <b>UMU D7</b>            |            | <b>PMU D7</b> |            | <b>p value</b> |
| <b>Cytokine</b>                                                     | <b>pg/ml</b>             | <b>STD</b> | <b>pg/ml</b>  | <b>STD</b> |                |
| G-CSF                                                               | 276.5                    | 279.5      | 824.4         | 177.6      | **             |
| IL-6                                                                | 75.5                     | 100.1      | 119.7         | 72.6       |                |
| IL-17                                                               | <2.0                     | 0.0        | 357.0         | 115.7      | **             |
| Eotaxin                                                             | 36.3                     | 33.4       | 138.9         | 21.3       | ***            |
| LIF                                                                 | 4.7                      | 4.3        | 22.1          | 8.0        | **             |
| IP-10                                                               | 91.6                     | 39.0       | 1,060.0       | 67.5       | ****           |
| KC                                                                  | 18.5                     | 37.7       | 186.5         | 48.6       | ***            |
| MIP-1b                                                              | <49.6                    | 0.0        | 205.9         | 60.1       | **             |
| M-CSF                                                               | 10.2                     | 4.4        | 52.4          | 9.0        | ***            |
| MIP-1a                                                              | 56.1                     | 19.8       | 426.6         | 95.8       | ***            |
| MIP-2                                                               | <31.5                    | 0.0        | 230.9         | 104.5      | *              |
| MIG                                                                 | 38.0                     | 27.2       | 489.2         | 68.9       | ****           |
| IL-5                                                                | <2.2                     | 0.0        | <2.2          | 0.0        |                |
| RANTES                                                              | <1.7                     | 0.0        | 4.9           | 1.2        | **             |
| IL-1b                                                               | 2.2                      | 0.7        | 60.9          | 28.0       | **             |
| TNF-a                                                               | <2.0                     | 0.0        | 20.2          | 6.6        | **             |
| 1l-12p40                                                            | 8.5                      | 8.1        | 63.8          | 18.7       | **             |
| IL-1a                                                               | 178.7                    | 134.8      | 359.9         | 111.9      | *              |
| IL-4                                                                | <2.3                     | 0.0        | <2.3          | 0.0        |                |
| IFN-g                                                               | 19.3                     | 10.1       | 42.2          | 5.6        | **             |
| IL-3                                                                | <2.1                     | 0.0        | 3.7           | 2.4        |                |
| MCP-1                                                               | 8.8                      | 9.1        | 131.2         | 34.5       | ***            |
| IL12-p70                                                            | <1.7                     | 0.0        | 21.1          | 11.7       | *              |
| GM-CSF                                                              | 4.3                      | 3.4        | 33.8          | 12.8       | **             |
| IL-15                                                               | 61.2                     | 17.6       | 114.9         | 18.3       | **             |
| LIX                                                                 | 36.2                     | 77.1       | 29.4          | 51.8       |                |
| IL-2                                                                | 12.9                     | 4.0        | 17.1          | 7.1        |                |
| IL-7                                                                | 1.9                      | 0.4        | 10.9          | 6.5        | *              |
| IL-10                                                               | 12.1                     | 5.4        | 9.2           | 1.7        |                |
| VEGF                                                                | 19.5                     | 6.8        | 84.1          | 14.0       | ***            |
| IL-9                                                                | 92.4                     | 45.2       | 228.5         | 150.2      |                |
| IL-13                                                               | <3.6                     | 0.0        | <3.6          | 0.0        |                |
