# Supplementary material for: Systemic prime exacerbates the ocular immune response to heat-killed Mycobacterium tuberculosis
Source: PubMed Central journal article supplement (PMC10240933; doi:10.1016/j.exer.2022.109198), 2022-07-31
Supplement: NIHMS1899506-supplement-Supplemental_Table_3.pdf [file NIHMS1899506-supplement-Supplemental_Table_3.pdf]

**Supplemental table 3. Serum Cytokine concentration**

| Cytokine | Serum |       |              |       |      |        |       |        |       |     |
|----------|-------|-------|--------------|-------|------|--------|-------|--------|-------|-----|
|          | Naïve |       | Primed naïve |       | p    | UMU D7 |       | PMU D7 |       |     |
|          | pg/ml | STD   | pg/ml        | STD   |      | pg/ml  | STD   | pg/ml  | STD   | p   |
| G-CSF    | 430.5 | 364.3 | 2,015        | 1,279 | **   | 473.2  | 426.6 | 1,769  | 989.8 | *   |
| IL-6     | 2.6   | 2.1   | 20.3         | 32.5  |      | 5.2    | 5.4   | 9.3    | 10.6  |     |
| IL-17    | <19.5 | 0     | <19.5        | 0     |      | <19.5  | 0     | 24.2   | 8.2   |     |
| Eotaxin  | 946.3 | 370   | 772.9        | 189.9 |      | 614.3  | 300.7 | 1,142  | 209.6 | *** |
| LIF      | <3.6  | 0     | <3.6         | 0     |      | <3.6   | 0     | <3.6   | 0     |     |
| IP-10    | 61.75 | 30.3  | 114.1        | 39.1  | *    | 60.5   | 32.32 | 145.4  | 59.5  | *   |
| KC       | 31.32 | 8.5   | 55.1         | 36.2  |      | 20.8   | 16.67 | 30.9   | 13.4  |     |
| MIP-1b   | 9.973 | 8.2   | 16.3         | 15.5  |      | 10.8   | 10.75 | 22.6   | 13.5  |     |
| M-CSF    | <2.4  | 0     | <2.4         | 0     |      | <2.4   | 0     | <2.4   | 0     |     |
| MIP-1a   | 36.19 | 43.6  | 149.6        | 46.1  | **** | 33.2   | 38.36 | 109.7  | 52.3  | *   |
| MIP-2    | 118.9 | 28.8  | 127.7        | 25.2  |      | 122.7  | 49.02 | 106.8  | 55.5  |     |
| MIG      | 147.6 | 54.3  | 145.9        | 59.4  |      | 120.5  | 88.96 | 189.9  | 63.7  |     |
| IL-5     | <22   | 0     | <22          | 0     |      | <22    | 0     | <22    | 0     |     |
| RANTES   | <2.9  | 0     | <2.9         | 0     |      | <2.9   | 0     | <2.9   | 0     |     |
| IL-1b    | <2.5  | 0     | <2.5         | 0     |      | <2.5   | 0     | <2.5   | 0     |     |
| TNF-a    | <3.2  | 0     | <3.2         | 0     |      | <3.2   | 0     | <3.2   | 0     |     |
| 1l-12p40 | 2.11  | 0     | 2.11         | 0     |      | 2.1    | 0     | 2.11   | 0     |     |
| IL-1a    | 287.8 | 201.4 | 533.1        | 259.7 |      | 301.5  | 185   | 791.9  | 694.7 |     |
| IL-4     | <30   | 0     | <30          | 0     |      | <30    | 0     | <30    | 0     |     |
| IFN-g    | <1.6  | 0     | <1.6         | 0     |      | <1.6   | 0     | <1.6   | 0     |     |
| IL-3     | <16   | 0     | <16          | 0     |      | <16    | 0     | <16    | 0     |     |
| MCP-1    | 33.4  | 35.3  | 41.5         | 30.1  |      | 7.6    | 5     | 36.8   | 20.3  | **  |
| IL12-p70 | <2.4  | 0     | <2.4         | 0     |      | <2.4   | 0     | <2.4   | 0     |     |
| GM-CSF   | <1.5  | 0     | <1.5         | 0     |      | <1.5   | 0     | <1.5   | 1.5   |     |
| Il-15    | 11.46 | 11.2  | 15.5         | 11.2  |      | 7.3    | 8.1   | 14.2   | 12    |     |
| LIX      | -     | -     | -            | -     |      | -      | -     | -      | -     |     |
| IL-2     | <16   | 0     | <16          | 0     |      | <16    | 0     | 16.8   | 2.413 |     |
| IL-7     | <3.6  | 0     | <3.6         | 0     |      | <3.6   | 0     | <3.6   | 0     |     |
| Il-10    | <3.5  | 0     | <3.5         | 0     |      | <3.5   | 0     | <3.5   | 0     |     |
| VEGF     | <2.5  | 0     | <2.5         | 0     |      | <2.5   | 0     | <2.5   | 0     |     |
| Il-9     | 33.14 | 20    | 98.9         | 40.2  | ***  | 28.1   | 22.3  | 48.7   | 33.1  |     |
| Il-13    | 82.1  | 33    | 89.3         | 22.6  |      | 101    | 43.3  | 102.3  | 33.6  |     |
