# Supplementary material for: Systemic prime exacerbates the ocular immune response to heat-killed Mycobacterium tuberculosis
Source: PubMed Central journal article supplement (PMC10240933; doi:10.1016/j.exer.2022.109198), 2022-07-31
Supplement: NIHMS1899506-supplement-Supplemental_Table_4.pdf [file NIHMS1899506-supplement-Supplemental_Table_4.pdf]

**Supplemental Table 4 Criteria for OCT inflammation score**

| <b>Score</b> | <b>Anterior Chamber</b>                                                                                                          | <b>Posterior Chamber</b>                                                                                                                                                                                                                                    |
|--------------|----------------------------------------------------------------------------------------------------------------------------------|-------------------------------------------------------------------------------------------------------------------------------------------------------------------------------------------------------------------------------------------------------------|
| <b>NA</b>    | No view beyond anterior cornea                                                                                                   | No view of posterior segment                                                                                                                                                                                                                                |
| <b>0</b>     | No inflammation                                                                                                                  | No inflammation                                                                                                                                                                                                                                             |
| <b>0.5</b>   | 1–5 cells in the aqueous<br>OR corneal edema                                                                                     | Few cells (<50) occupying less than 10% of the vitreous area<br>No subretinal or intraretinal infiltrates or retinal architecture disruption                                                                                                                |
| <b>1</b>     | 6–20 cells in the aqueous<br>OR a single layer of cells on the anterior lens capsule                                             | > 50 cells diffusely (no dense clumps) occupying between 10 and 50% of the vitreous area.<br>No subretinal or intraretinal infiltrates or retinal architecture disruption                                                                                   |
| <b>2</b>     | 20–100 cells in the aqueous<br>OR fewer than 20 cells and a hypopyon present                                                     | > 100 cells diffusely (no dense clumps) occupying > 50% of the vitreous area<br>No subretinal or intraretinal infiltrates or retinal architecture disruption                                                                                                |
| <b>3</b>     | 20–100 cells in the aqueous<br>AND a hypopyon OR a pupillary membrane                                                            | > 100 cells AND at least one dense vitreous opacity occupying 10–20% of the vitreous area (small opacity)<br>OR > 100 cells and rare ( $\leq 2$ ) subretinal or intraretinal opacities or retinal pathology                                                 |
| <b>4</b>     | Any number of aqueous cells<br>AND a large hypopyon and pupillary membrane OR anterior structure loss due to severe inflammation | Any amount of individual vitreous cell AND dense vitreous opacity occupying > 20% of the vitreous area (large opacity)<br>OR any amount of individual vitreous cell AND many >3 subretinal or intraretinal opacities or other significant retinal pathology |
