# Supplementary material for: Systemic prime exacerbates the ocular immune response to heat-killed Mycobacterium tuberculosis
Source: PubMed Central journal article supplement (PMC10240933; doi:10.1016/j.exer.2022.109198), 2022-07-31
Supplement: NIHMS1899506-supplement-Supplemental_Table_5.pdf [file NIHMS1899506-supplement-Supplemental_Table_5.pdf]

**Supplemental Table 5. Criteria for Histology Score**

| <b>Criteria</b>               | <b>0</b>                                                              | <b>1</b>                                                                                         | <b>2</b>                                                                                        |
|-------------------------------|-----------------------------------------------------------------------|--------------------------------------------------------------------------------------------------|-------------------------------------------------------------------------------------------------|
| Anterior Chamber (AC) Protein | Scant acellular particles staining with eosin in the AC               | Moderate, but not confluent, extracellular eosin staining anywhere in the AC                     | Confluent or near confluent extracellular eosin staining throughout the AC                      |
| Anterior Chamber (AC) Cell    | No cells                                                              | 1–100 cells, but no dense aggregations of cells                                                  | >100 cells, or dense aggregations of cells                                                      |
| Ciliary Body Inflammation     | No leukocyte infiltration of the ciliary body or surrounding vitreous | Unilateral presence of leukocytes infiltrating the ciliary body and/or the surrounding vitreous. | Bilateral presence of leukocytes infiltrating the ciliary body and/or the surrounding vitreous. |
| Vitreous celll                | rare to no cells                                                      | 1–100 cells, but no dense aggregations of cells                                                  | > 100 cells or dense aggregations of cell                                                       |
| Retinal Vascular Inflammation | No retinal vessels with perivascular leukocytes                       | One vessel per section with perivascular leukocytes                                              | >1 vessel per section with perivascular leukocytes                                              |
| Retinal fold or damage        | No retinal damage                                                     | 1–3 retinal folds per section                                                                    | >3 retinal folds per section, or any other retinal layer destruction or intraretinal hemorrhage |
